# Supplementary material
Source: PubMed Central journal article supplement (PMC2798468)
Supplement: supp_30_2_508__1.pdf [file supp_30_2_508__1.pdf]

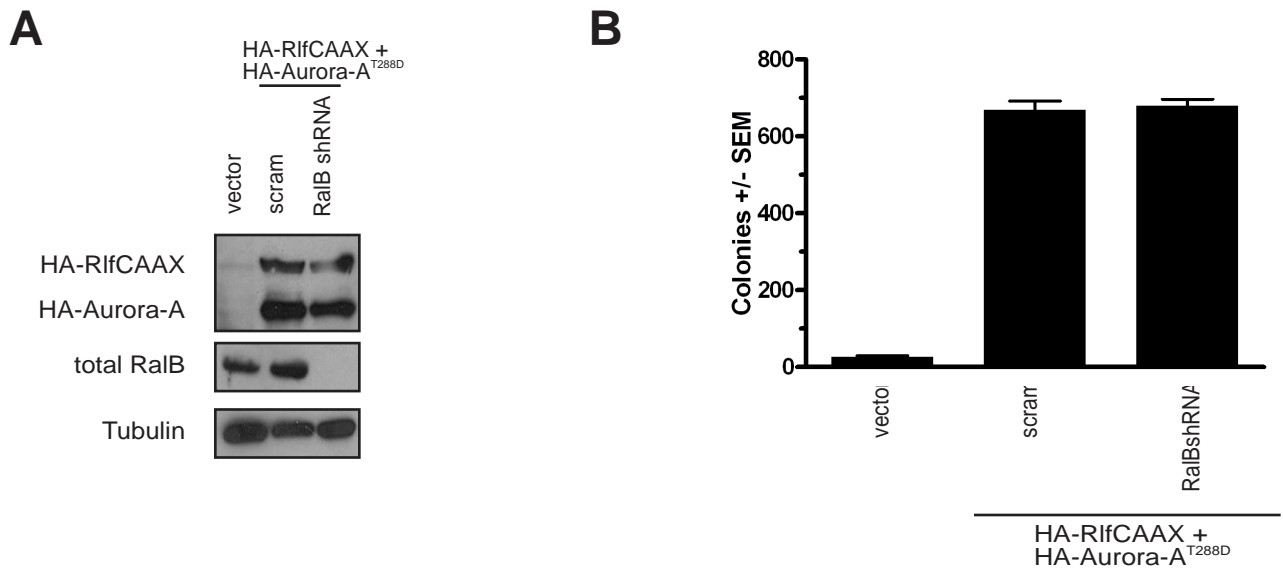

### Supplemental Figure 1. Aurora-A potentiation of RalGEF-transformation does not require RalB

**(A)** Appropriate expression, as detected by immunoblot, of HA-Aurora-A<sup>T288D</sup>, HA-Rlf-CAAX, knock down of endogenous RalB in HEK-TtH cells stably infected with retroviruses encoding no transgene (vector) or the indicated transgenes in the presence of shRNA specific to RalB or a scrambled version (scram) of this sequence. Actin serves as a loading control.

**(B)** Anchorage-independent growth in soft agar of aforementioned polyclonal HEK-TtH cells infected with retroviruses encoding the indicated shRNAs and transgenes, expressed as average colonies  $\pm$  SEM from six plates (two independent experiments conducted in triplicate).

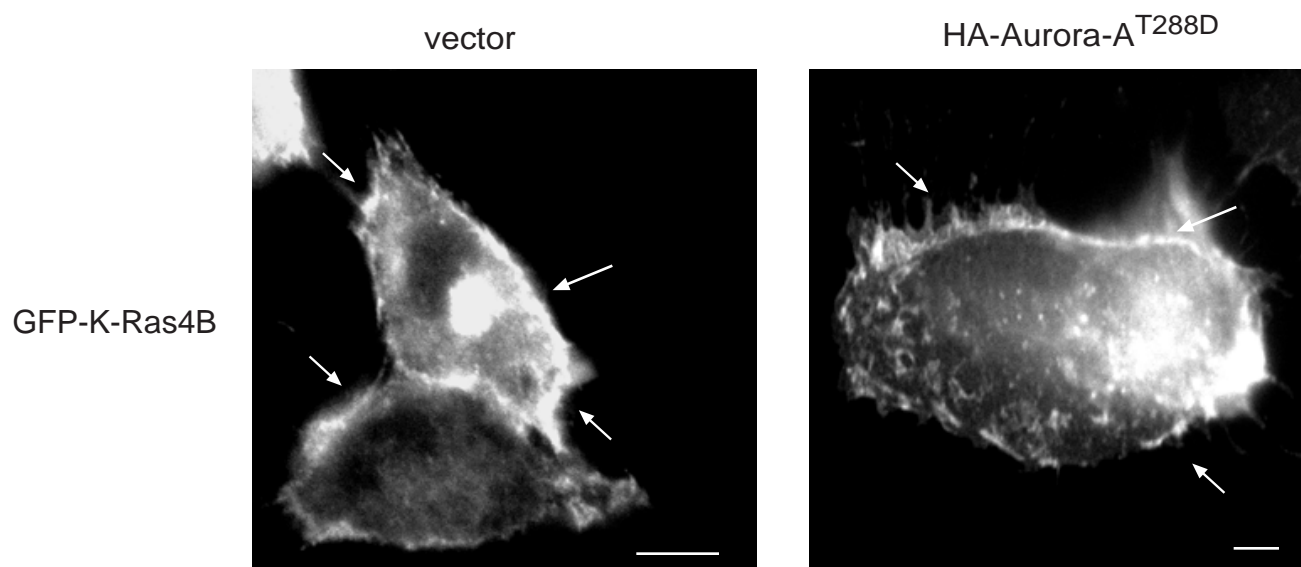

**Supplemental Figure 2. K-Ras localization is unchanged upon expression of Aurora-A<sup>T288D</sup>**

Distribution of GFP-K-Ras4B in HEK-TtH cells stably expressing vector or HA-Aurora-A<sup>T288D</sup>. arrows: plasma membrane localization. scale bar: 20 $\mu$ m.

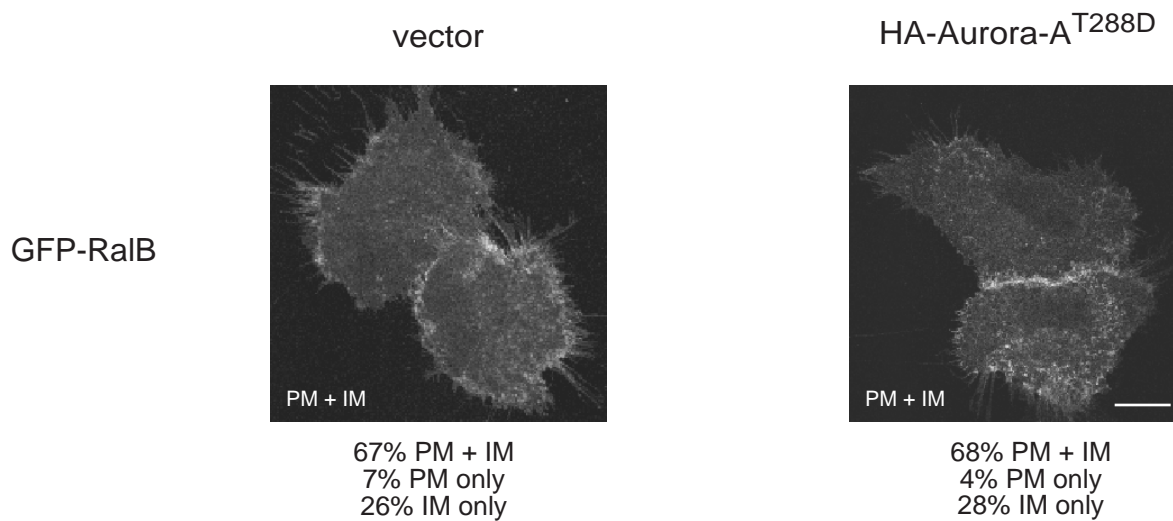

**Supplemental Figure 3. RalB localization is unchanged upon expression of Aurora-A<sup>T288D</sup>**

Distribution of GFP-RalB in HEK-TtH cells stably expressing vector or HA-Aurora-A<sup>T288D</sup>. GFP-RalB localization to plasma membrane + internal membrane (PM+IM), plasma membrane only (PM), or internal membrane only (IM) was quantitated in 50 cells in two independent experiments for each condition. Representative images with the primary location are displayed. arrows: plasma membrane localization. scale bar: 20μm.

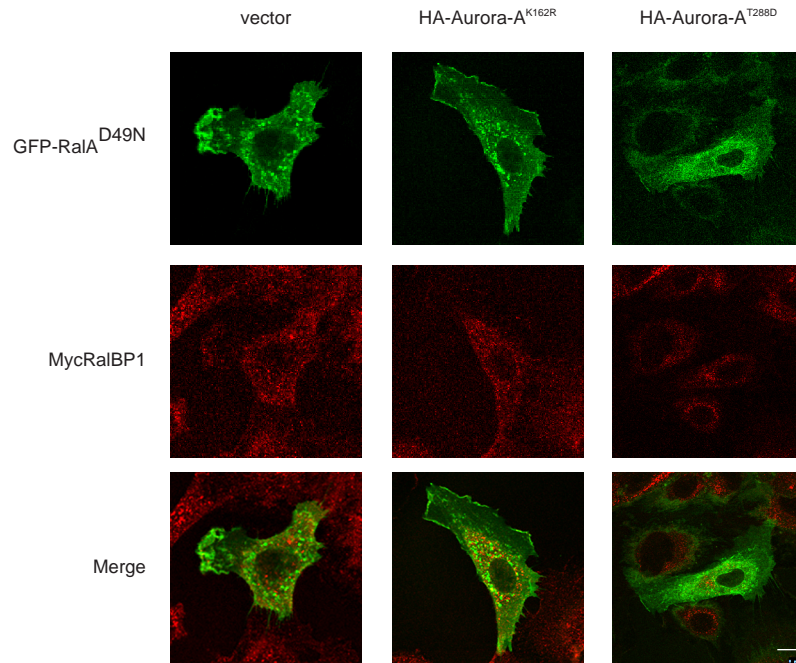

**Supplemental Figure 4. Aurora-A expression does not alter RalBP1 localization in presence of effector domain mutant of RalA<sup>D49N</sup>**

Distribution of GFP-RalA<sup>D49N</sup> and Myc-tagged RalBP1 (MycRBP1) visualized by immunofluorescence using an  $\alpha$ -Myc antibody in HEK-TtH cells stably expressing either vector control, kinase-inactive HA-Aurora-A<sup>K162R</sup> or kinase-active HA-Aurora-A<sup>T288D</sup>. scale bar: 20 $\mu$ m.

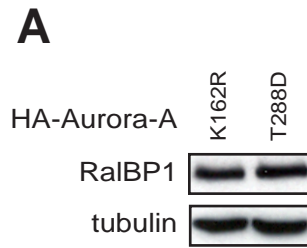

**Supplemental Figure 5. Expression of activated Aurora A does not change the levels of RalBP1.**  
**(A)** RalBP1 and tubulin levels in HEK-TtH cells stably expressing either HA-Aurora A<sup>K162</sup> or HA-Aurora A<sup>T288D</sup>.

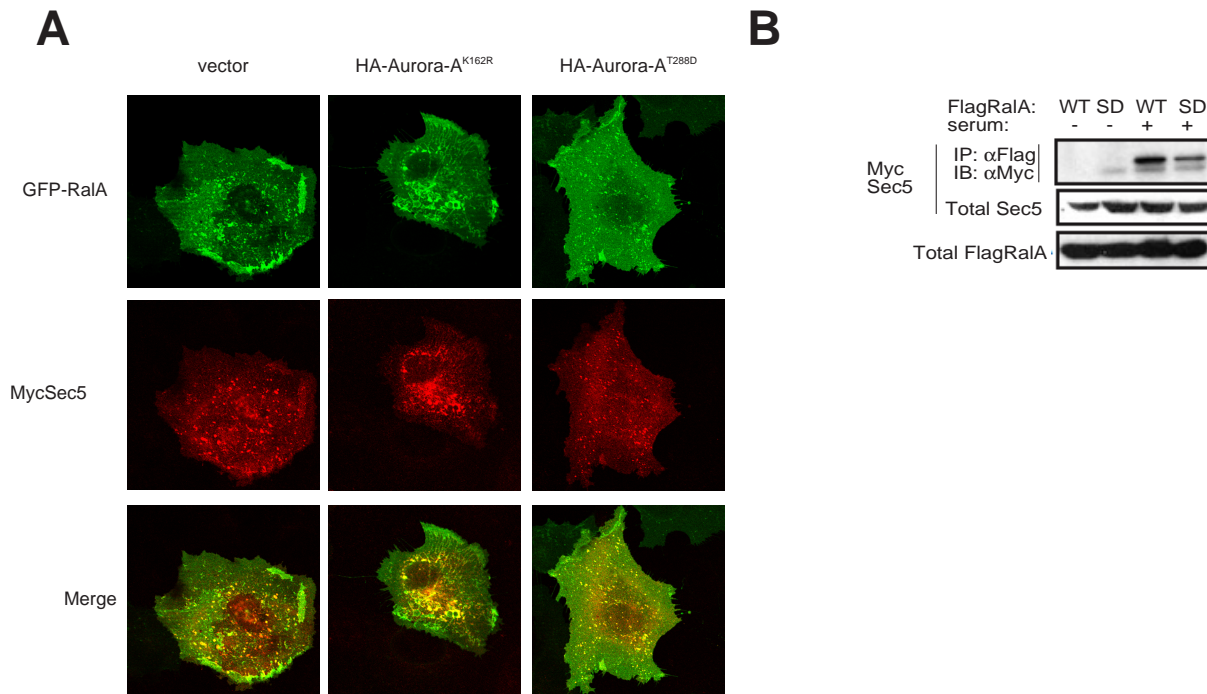

**Supplemental Figure 6. Aurora-A expression does not alter Sec5 localization or association with RalA**  
**(A)** Distribution of GFP-RalA and Myc-tagged Sec5 (MycSec5) visualized by immunofluorescence using an α-Myc antibody in HEK-TtH cells stably expressing either vector control, kinase-inactive HA-Aurora-A<sup>K162R</sup> or kinase-active HA-Aurora-A<sup>T288D</sup>. scale bar: 20μm.

**(B)** Aurora-A does not alter association of RalA with Sec5. Immunoprecipitation (IP) of Flag-tagged wild-type (WT) or phosphomimetic S194D (SD) mutant version of RalA followed by immunoblot (IB) to detect Flag-tagged immunoprecipitated RalA protein or the presence or absence of co-immunoprecipitated Myc-tagged Sec5 in the presence or absence of serum to activate the RalA protein. Total Sec5 and FlagRalA serve as loading controls.

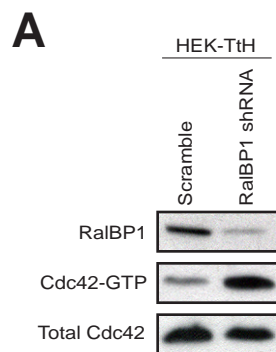

**Supplemental Figure 7. Knockdown of RalBP1 activates Cdc42.**

**(A)** GTP-Cdc42 levels in HEK-TtH cells stably expressing shRNA against either vector control or RalBP1.

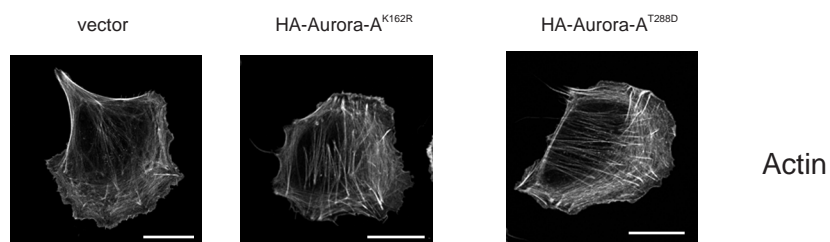

**Supplemental Figure 8. Aurora-A expression does not alter actin cytoskeleton organization in HEK-TtH cells**  
 Actin organization visualized by immunofluorescence using TxRed-Phalloidin in HEK-TtH cells stably expressing either vector control, kinase-inactive HA-Aurora-A<sup>K162R</sup> or kinase-active HA-Aurora-A<sup>T288D</sup>. scale bar: 25μm.

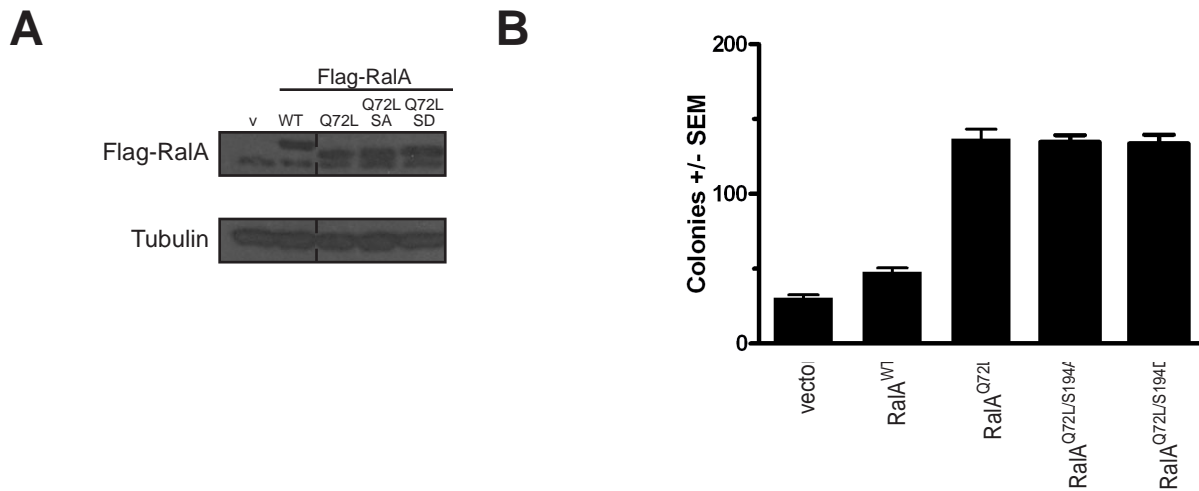

**Supplemental Figure 9. Mutation at S194 of RalA did not alter transformation of constitutively active RalA<sup>Q72L</sup>**

**(A)** Appropriate expression, as detected by immunoblot of HEK293T cells stably infected with retroviruses encoding empty vector (v), RalA<sup>WT</sup> (WT), RalA<sup>Q72L</sup> (Q72L), RalA<sup>Q72L/S194A</sup> (Q72LSA), or RalA<sup>Q72L/S194D</sup> (Q72LSD). Actin serves as a loading control.

**(B)** Anchorage-independent growth in soft agar of aforementioned polyclonal HEK-293T cells infected with retroviruses encoding the indicated transgenes, expressed as average number of colonies  $\pm$  SEM from six plates (two independent experiments conducted in triplicate)..
